# Supplementary material
Source: MDPI journal article supplement (https://www.mdpi.com/2571-8789/7/1/6)

## Supplementary Materials

**Table S1.** Number of study sites on photodegradation in different countries. Note that two studies\* includes studies from more than one country.

| Country                              | Number of study sites |
|--------------------------------------|-----------------------|
| Argentina                            | 7                     |
| Australia                            | 1                     |
| Brazil                               | 1                     |
| Chile                                | 1                     |
| China                                | 13                    |
| Finland                              | 1                     |
| France                               | 2                     |
| India                                | 1                     |
| Israel                               | 1                     |
| *Israel, Italy, Spain                | 1                     |
| Japan                                | 1                     |
| Netherlands                          | 1                     |
| New Zealand                          | 2                     |
| *Norway, Sweden, Netherlands, Greece | 1                     |
| Russia                               | 1                     |
| Spain                                | 2                     |
| Sweden                               | 2                     |
| UK                                   | 4                     |
| USA                                  | 26                    |
|                                      | 69                    |

**Table S2.** Number of studies with different duration (number of days) in experimental photodegradation studies.

| <b>Number of days</b> | <b>Number of studies</b> |
|-----------------------|--------------------------|
| 0-99                  | 8                        |
| 100-200               | 11                       |
| 200-300               | 8                        |
| 300-400               | 15                       |
| 400-500               | 9                        |
| 500-600               | 1                        |
| 600-700               | 2                        |
| 700-800               | 6                        |
| 800-900               | 3                        |
| 900-1000              | 1                        |
| 1000-2000             | 3                        |
| 3000-4000             | 2                        |

**Table S3.** Number of litter (plant) species used in photodegradation studies.

| <b>No. of species</b> | <b>Number of studies</b> | <b>%</b> |
|-----------------------|--------------------------|----------|
| <b>1</b>              | 24                       | 34.8     |
| <b>2</b>              | 21                       | 30.4     |
| <b>3</b>              | 13                       | 18.8     |
| <b>4</b>              | 1                        | 1.4      |
| <b>5</b>              | 3                        | 4.3      |
| <b>6</b>              | 3                        | 4.3      |
| <b>8</b>              | 1                        | 1.4      |
| <b>12</b>             | 2                        | 2.9      |
| <b>23</b>             | 1                        | 1.4      |

**Table S4.** List of litter (plant) species used in studies (number of studies & percentage), plant functional group, plant family.

| Abbreviation               | Plant species name                    | Number of studies | %   | Functional plant group | Family        |
|----------------------------|---------------------------------------|-------------------|-----|------------------------|---------------|
| <i>A. auracana</i>         | <i>Araucaria auracana</i>             | 1.0               | 0.5 | tree                   | Araucariaceae |
| <i>A. bracteata</i>        | <i>Atraphaxis bracteata</i>           | 1.0               | 0.5 | shrub                  | Polygonaceae  |
| <i>A. calamus</i>          | <i>Acorus calamus</i>                 | 1.0               | 0.5 | forb                   | Acoraceae     |
| <i>A. carpinifolium</i>    | <i>Acer carpinifolium</i>             | 1.0               | 0.5 | tree                   | Sapindaceae   |
| <i>A. coriacea</i>         | <i>Acacia coriacea</i>                | 1.0               | 0.5 | tree                   | Fabaceae      |
| <i>A. deltoidea</i>        | <i>Ambrosia deltoidea</i>             | 3.0               | 1.5 | shrub                  | Asteraceae    |
| <i>A. fatua</i>            | <i>Avena fatua</i>                    | 2.0               | 1.0 | grass                  | Poaceae       |
| <i>A. gerardi</i>          | <i>Andropogon gerardi</i>             | 2.0               | 1.0 | grass                  | Poaceae       |
| <i>A. longiseta</i>        | <i>Aristida longiseta</i>             | 1.0               | 0.5 | grass                  | Poaceae       |
| <i>A. ordosica</i>         | <i>Artemisia ordosica</i>             | 1                 | 0.5 | shrub                  | Asteraceae    |
| <i>A. pungens</i>          | <i>Agriophyllum pungens</i>           | 1                 | 0.5 | forb                   | Amaranthaceae |
| <i>A. purpurea</i>         | <i>Aristida purpurea</i>              | 1                 | 0.5 | grass                  | Poaceae       |
| <i>A. rubrum L.</i>        | <i>Acer rubrum</i>                    | 1                 | 0.5 | tree                   | Sapindaceae   |
| <i>A. saccharum</i>        | <i>Acer saccharum</i>                 | 1                 | 0.5 | tree                   | Sapindaceae   |
| <i>A. sterilis</i>         | <i>Avena sterilis</i>                 | 2                 | 1.0 | grass                  | Poaceae       |
| <i>B. diandrus</i>         | <i>Bromus diandrus</i>                | 3                 | 1.5 | grass                  | Poaceae       |
| <i>B. eriopoda</i>         | <i>Bouteloua eriopoda</i>             | 2                 | 1.0 | grass                  | Poaceae       |
| <i>B. gracilis</i>         | <i>Bouteloua gracilis</i>             | 4                 | 2.1 | grass                  | Poaceae       |
| <i>B. multiradiata</i>     | <i>Baileya multiradiata</i>           | 1                 | 0.5 | shrub                  | Asteraceae    |
| <i>B. pendula</i>          | <i>Betula pendula</i>                 | 1                 | 0.5 | tree                   | Betulaceae    |
| <i>B. pictus</i>           | <i>Bromus pictus</i>                  | 1                 | 0.5 | grass                  | Poaceae       |
| <i>B. platyphylla</i>      | <i>Betula platyphylla</i>             | 1                 | 0.5 | tree                   | Betulaceae    |
| <i>B. pubescens</i>        | <i>Betula pubescens</i>               | 1                 | 0.5 | tree                   | Betulaceae    |
| <i>B. rubens L.</i>        | <i>Bromus rubens L.</i>               | 1                 | 0.5 | grass                  | Poaceae       |
| <i>C. acanthoides</i>      | <i>Carduus acanthoides</i>            | 1                 | 0.5 | forb                   | Asteraceae    |
| <i>C. arenaria</i>         | <i>Carex arenaria</i>                 | 1                 | 0.5 | grass                  | Cyperaceae    |
| <i>C. camphora</i>         | <i>Cinnamomum camphora</i>            | 3                 | 1.5 | tree                   | Lauraceae     |
| <i>C. chinganicum</i>      | <i>Corispermum chinganicum</i>        | 1                 | 0.5 | forb                   | Amaranthaceae |
| <i>C. citratus</i>         | <i>Cymbopogon citratus</i>            | 1                 | 0.5 | grass                  | Poaceae       |
| <i>C. culeou</i>           | <i>Chusquea culeou</i>                | 1                 | 0.5 | grass                  | Poaceae       |
| <i>C. dactylon</i>         | <i>Cynodon dactylon</i>               | 3                 | 1.5 | grass                  | Poaceae       |
| <i>C. epigejos</i>         | <i>Calamagrostis epigejos</i>         | 1                 | 0.5 | grass                  | Poaceae       |
| <i>C. fortunei</i>         | <i>Cryptomeria fortunei</i>           | 1                 | 0.5 | tree                   | Cupressaceae  |
| <i>C. glauca</i>           | <i>Cyclobalanopsis glauca</i>         | 1                 | 0.5 | tree                   | Fagaceae      |
| <i>C. korshinskii</i>      | <i>Caragana korshinskii</i>           | 2                 | 1.0 | shrub                  | Fabaceae      |
| <i>C. lanceolata</i>       | <i>Cunninghamia lanceolata</i>        | 3                 | 1.5 | tree                   | Cupressaceae  |
| <i>C. monspeliensis</i>    | <i>Cistus monspeliensis</i>           | 1                 | 0.5 | shrub                  | Cistaceae     |
| <i>C. pseudophragmites</i> | <i>Calamagrostis pseudophragmites</i> | 1                 | 0.5 | grass                  | Poaceae       |

|                                          |                                                  |   |     |       |                |
|------------------------------------------|--------------------------------------------------|---|-----|-------|----------------|
| <i>C. squarrosa</i>                      | <i>Cleistogenes squarrosa</i>                    | 1 | 0.5 | grass | Poaceae        |
| <i>C. vesicaria</i>                      | <i>Crepis vesicaria</i>                          | 1 | 0.5 | forb  | Asteraceae     |
| <i>C. villosa</i>                        | <i>Calicotome villosa</i>                        | 1 | 0.5 | shrub | Fabaceae       |
| <i>D. Glauca</i>                         | <i>Drypetes Glauca</i>                           | 1 | 0.5 | tree  | Putranjivaceae |
| <i>D. glomerata</i>                      | <i>Dactylis glomerata</i>                        | 1 | 0.5 | grass | Poaceae        |
| <i>D. pentaphyllum</i>                   | <i>Dorycnium pentaphyllum</i>                    | 1 | 0.5 | shrub | Fabaceae       |
| <i>E. camaldulensis subsp. Refulgens</i> | <i>Eucalyptus camaldulensis subsp. Refulgens</i> | 1 | 0.5 | tree  | Myrtaceae      |
| <i>E. curvula</i>                        | <i>Eragrostis curvula</i>                        | 1 | 0.5 | grass | Poaceae        |
| <i>E. farinosa A.</i>                    | <i>Encelia farinosa A.</i>                       | 1 | 0.5 | shrub | Asteraceae     |
| <i>E. frutescens</i>                     | <i>Encelia frutescens</i>                        | 1 | 0.5 | shrub | Asteraceae     |
| <i>E. glaucus</i>                        | <i>Elymus glaucus</i>                            | 1 | 0.5 | grass | Poaceae        |
| <i>E. oxyrrhynchum</i>                   | <i>Erodium oxyrrhynchum</i>                      | 1 | 0.5 | forb  | Geraniaceae    |
| <i>F. americana</i>                      | <i>Fraxinus americana</i>                        | 1 | 0.5 | tree  | Oleaceae       |
| <i>F. camtschatica</i>                   | <i>Filipendula camtschatica</i>                  | 1 | 0.5 | forb  | Rosaceae       |
| <i>F. crenata Blume</i>                  | <i>Fagus crenata Blume</i>                       | 1 | 0.5 | tree  | Fagaceae       |
| <i>F. excelsior</i>                      | <i>Fraxinus excelsior</i>                        | 2 | 1.0 | tree  | Oleaceae       |
| <i>F. hieronymi</i>                      | <i>Festuca hieronymi</i>                         | 1 | 0.5 | grass | Poaceae        |
| <i>F. japonica</i>                       | <i>Fallopia japonica</i>                         | 1 | 0.5 | forb  | Polygonaceae   |
| <i>F. sylvatica</i>                      | <i>Fagus sylvatica</i>                           | 3 | 1.5 | tree  | Fagaceae       |
| <i>G. magellanica</i>                    | <i>Gunnera magellanica</i>                       | 1 | 0.5 | forb  | Gunneraceae    |
| <i>G. max</i>                            | <i>Glycine max</i>                               | 1 | 0.5 | forb  | Fabaceae       |
| <i>H. ammodendron</i>                    | <i>Haloxylon ammodendron</i>                     | 2 | 1.0 | shrub | Amaranthaceae  |
| <i>H. annuus</i>                         | <i>Helianthus annuus</i>                         | 1 | 0.5 | forb  | Asteraceae     |
| <i>H. italicum</i>                       | <i>Helichrysum italicum</i>                      | 1 | 0.5 | shrub | Asteraceae     |
| <i>H. laeve</i>                          | <i>Hedysarum laeve</i>                           | 1 | 0.5 | shrub | Fabaceae       |
| <i>H. lanatus L</i>                      | <i>Holcus lanatus L.</i>                         | 1 | 0.5 | forb  | Poaceae        |
| <i>H. sieboldiana</i>                    | <i>Hosta sieboldiana</i>                         | 1 | 0.5 | grass | Asparagaceae   |
| <i>H. vulgare L.</i>                     | <i>Hordeum vulgare L</i>                         | 1 | 0.5 | grass | Poaceae        |
| <i>J. monosperma</i>                     | <i>Juniperus monosperma</i>                      | 3 | 1.5 | shrub | Cupressaceae   |
| <i>L. divaricata</i>                     | <i>Larrea divaricata.</i>                        | 1 | 0.5 | shrub | Zygophyllaceae |
| <i>Larrea tridentata</i>                 | <i>Larrea tridentata</i>                         | 1 | 0.5 | shrub | Zygophyllaceae |
| <i>L. latifolium</i>                     | <i>Lepidium latifolium</i>                       | 1 | 0.5 | shrub | Brassicaceae   |
| <i>L. multiflorum</i>                    | <i>Lolium multiflorum</i>                        | 2 | 1.0 | grass | Poaceae        |
| <i>L. obtusiloba Blume</i>               | <i>Lindera obtusiloba Blume</i>                  | 1 | 0.5 | forb  | Lauraceae      |
| <i>L. perenne cv Nui</i>                 | <i>Lolium perenne cv Nui)</i>                    | 1 | 0.5 | grass | Poaceae        |
| <i>L. scopariumm</i>                     | <i>Leptospermum scoparium</i>                    | 1 | 0.5 | shrub | Myrtaceae      |
| <i>L. tridentata</i>                     | <i>Larrea tridentata</i>                         | 3 | 1.5 | shrub | Zygophyllaceae |
| <i>M. argentea</i>                       | <i>Melaleuca argentea</i>                        | 1 | 0.5 | tree  | Myrtaceae      |
| <i>M. boaria</i>                         | <i>Maytenus boaria</i>                           | 1 | 0.5 | tree  | Celastraceae   |
| <i>M. giganteus</i>                      | <i>Miscanthus x giganteus</i>                    | 1 | 0.5 | grass | Poaceae        |
| <i>M. spinosum</i>                       | <i>Mulinum spinosum</i>                          | 1 | 0.5 | shrub | Apiaceae       |

|                                     |                                         |   |     |       |                |
|-------------------------------------|-----------------------------------------|---|-----|-------|----------------|
| <i>N. antarctica</i>                | <i>Nothofagus antarctica</i>            | 1 | 0.5 | tree  | Nothofagaceae  |
| <i>N. dombeyi</i>                   | <i>Nothofagus dombeyi</i>               | 1 | 0.5 | tree  | Nothofagaceae  |
| <i>N. nervosa</i>                   | <i>Nothofagus nervosa</i>               | 1 | 0.5 | tree  | Nothofagaceae  |
| <i>N. obliqua</i>                   | <i>Nothofagus obliqua</i>               | 1 | 0.5 | tree  | Nothofagaceae  |
| <i>N. tenuis</i>                    | <i>Nassella tenuis</i>                  | 1 | 0.5 | grass | Poaceae        |
| <i>O. hymenoides</i>                | <i>Oryzopsis hymenoides</i>             | 1 | 0.5 | grass | Poaceae        |
| <i>O. sativa</i>                    | <i>Oryza sativa L.</i>                  | 2 | 1.0 | grass | Poaceae        |
| <i>O. tenuiflorum</i>               | <i>Ocimum tenuiflorum</i>               | 1 | 0.5 | shrub | Lamiaceae      |
| <i>O. tesota A</i>                  | <i>Olneya tesota A</i>                  | 1 | 0.5 | tree  | Fabaceae       |
| <i>P. australis</i>                 | <i>Phragmites australis</i>             | 1 | 0.5 | tree  | Poaceae        |
| <i>P. centrasiaticum</i>            | <i>Pennisetum centrasiaticum</i>        | 1 | 0.5 | grass | Poaceae        |
| <i>P. chilensis</i>                 | <i>Porlieria chilensis</i>              | 1 | 0.5 | grass | Zygophyllaceae |
| <i>P. deltoides</i>                 | <i>Populus deltoides sub. Wislizeni</i> | 1 | 0.5 | shrub | Salicaceae     |
| <i>P. edulis</i>                    | <i>Pinus edulis</i>                     | 1 | 0.5 | tree  | Pinaceae       |
| <i>P. glandulosa</i>                | <i>Prosopis glandulosa</i>              | 2 | 1.0 | tree  | Fabaceae       |
| <i>P. ligularis</i>                 | <i>Poa ligularis</i>                    | 3 | 1.5 | shrub | Poaceae        |
| <i>p. massoniana</i>                | <i>Pinus massoniana</i>                 | 2 | 1.0 | grass | Pinaceae       |
| <i>P. nigra</i>                     | <i>Populus nigra</i>                    | 2 | 1.0 | tree  | Salicaceae     |
| <i>P. ponderosa</i>                 | <i>Pinus ponderosa</i>                  | 2 | 1.0 | tree  | Pinaceae       |
| <i>P. pubescens</i>                 | <i>Phyllostachys pubescens</i>          | 1 | 0.5 | tree  | Poaceae        |
| <i>P. pungens</i>                   | <i>Proustia pungens</i>                 | 1 | 0.5 | shrub | Asteraceae     |
| <i>P. quadrifarium</i>              | <i>Paspalum quadrifarium</i>            | 1 | 0.5 | grass | Poaceae        |
| <i>P. radiata</i>                   | <i>Pinus radiata</i>                    | 2 | 1.0 | tree  | Pinaceae       |
| <i>P. resinosa</i>                  | <i>Pinus resinosa</i>                   | 1 | 0.5 | tree  | Pinaceae       |
| <i>P. sylvestris var. mongolica</i> | <i>Pinus sylvestris var. mongolica</i>  | 1 | 0.5 | tree  | Pinaceae       |
| <i>P. tremuloides</i>               | <i>Populus tremuloides</i>              | 1 | 0.5 | tree  | Salicaceae     |
| <i>P. trilobata</i>                 | <i>Pertya trilobata</i>                 | 1 | 0.5 | forb  | Asteraceae     |
| <i>P. velutina</i>                  | <i>Prosopis velutina</i>                | 4 | 2.1 | tree  | Fabaceae       |
| <i>P. villosa</i>                   | <i>Psammochloa villosa</i>              | 1 | 0.5 | grass | Poaceae        |
| <i>P. Xiaozhuanica</i>              | <i>Populus X xiaozhuanica</i>           | 1 | 0.5 | tree  | Salicaceae     |
| <i>Q. acutissima</i>                | <i>Quercus acutissima</i>               | 1 | 0.5 | tree  | Fagaceae       |
| <i>Q. crispula Blume</i>            | <i>Quercus crispula Blume</i>           | 1 | 0.5 | tree  | Fagaceae       |
| <i>Q. douglasii</i>                 | <i>Quercus douglasii</i>                | 1 | 0.5 | tree  | Fagaceae       |
| <i>Q. ellipsoidalis</i>             | <i>Quercus ellipsoidalis</i>            | 1 | 0.5 | tree  | Fagaceae       |
| <i>Q. macrocarpa</i>                | <i>Quercus macrocarpa</i>               | 1 | 0.5 | tree  | Fagaceae       |
| <i>Q. prinus</i>                    | <i>Quercus prinus</i>                   | 1 | 0.5 | tree  | Fagaceae       |
| <i>Q. robur</i>                     | <i>Quercus robur</i>                    | 4 | 2.1 | tree  | Fagaceae       |
| <i>R. sphaerocarpa</i>              | <i>Retama sphaerocarpa</i>              | 1 | 0.5 | shrub | Fabaceae       |
| <i>S. arabicus</i>                  | <i>Schismus arabicus</i>                | 1 | 0.5 | grass | Poaceae        |
| <i>S. chinensis</i>                 | <i>Schisandra chinensis</i>             | 1 | 0.5 | forb  | Schisandraceae |
| <i>S. chinensis</i>                 | <i>Simmondsia chinensis</i>             | 1 | 0.5 | shrub | Simmondsiaceae |

|                                               |                                               |     |     |       |                  |
|-----------------------------------------------|-----------------------------------------------|-----|-----|-------|------------------|
| <i>S. comata</i>                              | <i>Stipa comata</i>                           | 1   | 0.5 | grass | Poaceae          |
| <i>S. humilis</i>                             | <i>Stipa humilis</i>                          | 1   | 0.5 | grass | Poaceae          |
| <i>S. krylovii</i>                            | <i>Stipa krylovii</i>                         | 1   | 0.5 | grass | Poaceae          |
| <i>S. mellifera</i>                           | <i>Salvia mellifera</i>                       | 1   | 0.5 | shrub | Lamiaceae        |
| <i>S. officinale</i>                          | <i>Sisymbrium officinale</i>                  | 1   | 0.5 | shrub | Brassicaceae     |
| <i>S. passerine</i>                           | <i>Salsola passerine</i>                      | 1   | 0.5 | forb  | Amaranthaceae    |
| <i>S. prolifera</i>                           | <i>Scabiosa prolifera</i>                     | 2   | 1.0 | shrub | Dipsacaceae      |
| <i>S. psammophila</i>                         | <i>Salix psammophila</i>                      | 2   | 1.0 | shrub | Salicaceae       |
| <i>S. santolinum</i>                          | <i>Seriphidium santolinum</i>                 | 1   | 0.5 | shrub | Compositae       |
| <i>S. scoparium</i>                           | <i>Schizachyrium scoparium</i>                | 1   | 0.5 | grass | Poaceae          |
| <i>S. speciosa</i>                            | <i>Stipa speciosa</i>                         | 2   | 1.0 | grass | Poaceae          |
| <i>S. tenacissima</i>                         | <i>Stipa tenacissima</i>                      | 2   | 1.0 | grass | Poaceae          |
| <i>S. trichotoma</i>                          | <i>Stipa trichotoma</i>                       | 1   | 0.5 | grass | Poaceae          |
| <i>Scheuchzeria peat</i>                      | <i>Scheuchzeria peat</i>                      | 1   | 0.5 | forb  | Scheuchzeriaceae |
| <i>Sorghum bicolor cultivars</i>              | <i>Sorghum bicolor cultivars</i>              | 1   | 0.5 | grass | Poaceae          |
| <i>Sph. Fuscum peat</i>                       | <i>Sphagnum Fuscum peat</i>                   | 1   | 0.5 | NA    | Sphagnaceae      |
| <i>Sph. Papillosum peat</i>                   | <i>Sphagnum Papillosum peat</i>               | 1   | 0.5 | NA    | Sphagnaceae      |
| <i>T. aestivum</i>                            | <i>Triticum aestivum</i>                      | 3   | 1.5 | grass | Poaceae          |
| <i>T. ciliata</i>                             | <i>Toona ciliata</i>                          | 1   | 0.5 | tree  | Meliaceae        |
| <i>T. plicata</i>                             | <i>Thuja plicata</i>                          | 1   | 0.5 | tree  | Cupressaceae     |
| <i>T. sellowiana</i>                          | <i>Tibouchina sellowiana</i>                  | 1   | 0.5 | tree  | Melastomataceae  |
| <i>Tamarix Sp.</i>                            | <i>Tamarix Sp.</i>                            | 1   | 0.5 | tree  | Tamaricaceae     |
| <i>Tilia sp.</i>                              | <i>Tilia sp.</i>                              | 1   | 0.5 | tree  | Malvaceae        |
| <i>V. coignetiae</i>                          | <i>Vitis coignetiae</i>                       | 1   | 0.5 | shrub | Vitaceae         |
| <i>V. myrtillus</i>                           | <i>Vaccinium myrtillus</i>                    | 1   | 0.5 | shrub | Ericaceae        |
| <i>V. uliginosum</i>                          | <i>Vaccinium uliginosum</i>                   | 1   | 0.5 | shrub | Ericaceae        |
| <i>Lespedeza bicolor Turcz. var. bicolor.</i> | <i>Lespedeza bicolor Turcz. var. bicolor.</i> | 1   | 0.5 | shrub | Fabaceae         |
| <i>Z. mays</i>                                | <i>Zea mays</i>                               | 1   | 0.5 | grass | Poaceae          |
| 148                                           |                                               | 195 | 100 |       |                  |

**Table S5.** Effect of photodegradation on Carbon & nutrient breakdown in plant litter.

| Effect on mass loss/<br>climate | C loss positive (n)      | C loss positive (%)      | C loss negative (n)      | C loss negative (%)      | C loss no effect (n)      | C loss no effect (%)      | C loss NA      |
|---------------------------------|--------------------------|--------------------------|--------------------------|--------------------------|---------------------------|---------------------------|----------------|
| Arid                            | 7                        | 50                       | 2                        | 14                       | 1                         | 7                         | 4              |
| Semi-arid                       | 7                        | 35                       | 0                        | 0                        | 2                         | 10                        | 11             |
| Temperate                       | 5                        | 50                       | 0                        | 0                        | 2                         | 20                        | 3              |
| Subtropical                     | 4                        | 44                       | 2                        | 22                       | 0                         | 0                         | 3              |
| Lab condition                   | 7                        | 35                       | 3                        | 15                       | 5                         | 25                        | 5              |
| Total                           | 30                       | 41                       | 7                        | 10                       | 10                        | 14                        | 26             |
| Effect on mass loss/<br>climate | N loss positive (n)      | N loss positive (%)      | N loss negative (n)      | N loss negative (%)      | N loss no effect (n)      | N loss no effect (%)      | N loss NA      |
| Arid                            | 8                        | 53                       | 2                        | 13                       | 3                         | 20                        | 2              |
| Semi-arid                       | 7                        | 28                       | 3                        | 12                       | 10                        | 40                        | 5              |
| Temperate                       | 4                        | 31                       | 2                        | 15                       | 4                         | 31                        | 3              |
| Subtropical                     | 3                        | 30                       | 2                        | 20                       | 3                         | 30                        | 2              |
| Lab condition                   | 7                        | 33                       | 3                        | 14                       | 5                         | 24                        | 6              |
| Total                           | 29                       | 37                       | 12                       | 15                       | 25                        | 32                        | 18             |
| Effect on mass loss/<br>climate | lignin loss positive (n) | lignin loss positive (%) | lignin loss negative (n) | lignin loss negative (%) | lignin loss no effect (n) | lignin loss no effect (%) | lignin loss NA |
| Arid                            | 8                        | 57                       | 0                        | 0                        | 2                         | 14                        | 4              |
| Semi-arid                       | 8                        | 42                       | 2                        | 11                       | 3                         | 16                        | 7              |
| Temperate                       | 3                        | 27                       | 1                        | 9                        | 3                         | 27                        | 4              |
| Subtropical                     | 0                        | 0                        | 0                        | 0                        | 4                         | 44                        | 5              |
| Lab condition                   | 2                        | 11                       | 5                        | 26                       | 3                         | 16                        | 9              |
| Total                           | 21                       | 29                       | 8                        | 11                       | 15                        | 21                        | 29             |



**Figure S1.** Flowchart detailing the procedure implemented in this systematic review.

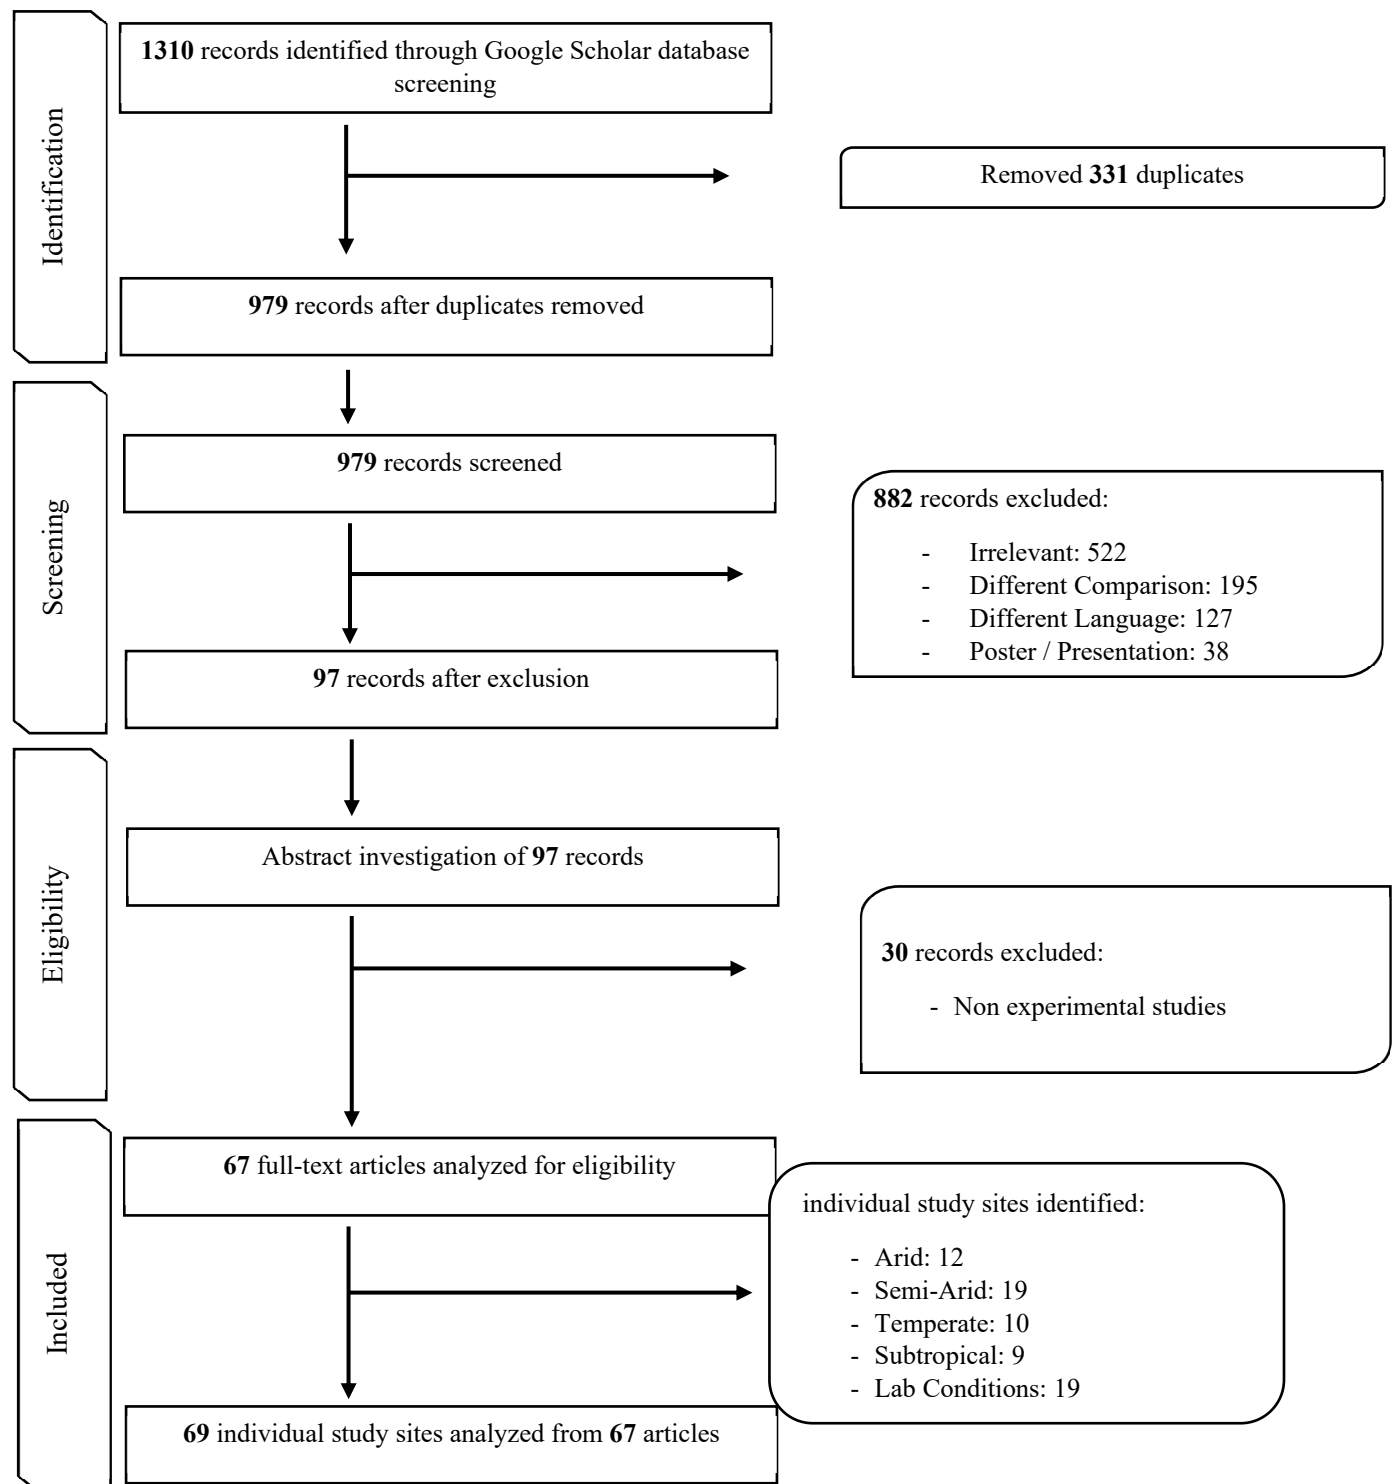

**Figure S2.** Percentage of litter from different plant functional groups used in photodegradation studies.

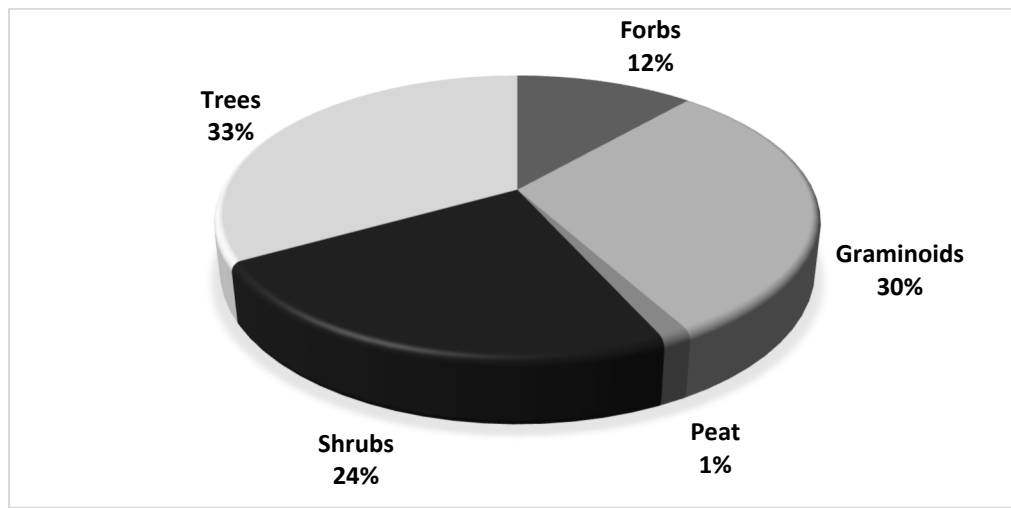

Supplement: s1 [file s1]
